# Supplementary material for: The Father in Youth Baseball: A Self-Determination Theory Approach
Source: MDPI journal article supplement (doi:10.3390/ijerph18094587), 2021-04-26

# Confirmatory factor analysis

| Instruments                                                 | $\chi^2$ | $p$     | $df$ | $\chi^2/df$ | NNFI | CFI  | RMSEA | SRMR |
|-------------------------------------------------------------|----------|---------|------|-------------|------|------|-------|------|
| Aspiration Index                                            | 2240.32  | < 0.001 | 552  | 4.05        | 0.96 | 0.97 | 0.07  | 0.08 |
| Basic Psychological Need Satisfaction and Frustration Scale | 835.11   | < 0.001 | 245  | 3.40        | 0.97 | 0.98 | 0.06  | 0.08 |
| Future Intention to Practice Baseball Scale                 | 55.22    | < 0.001 | 19   | 2.91        | 0.99 | 0.99 | 0.06  | 0.03 |

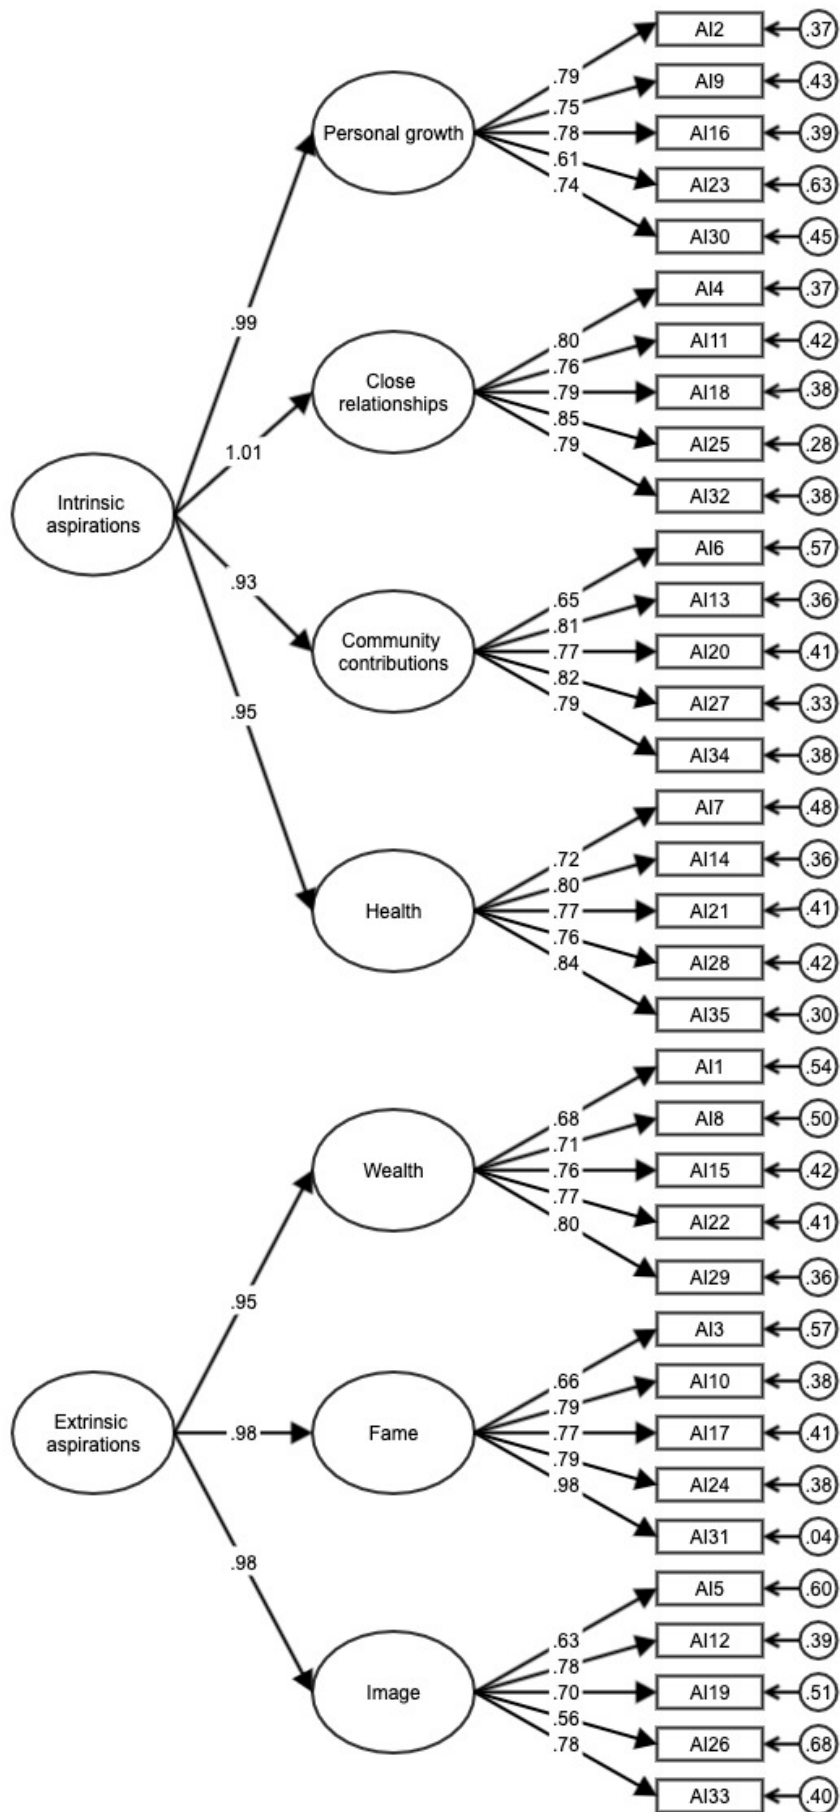

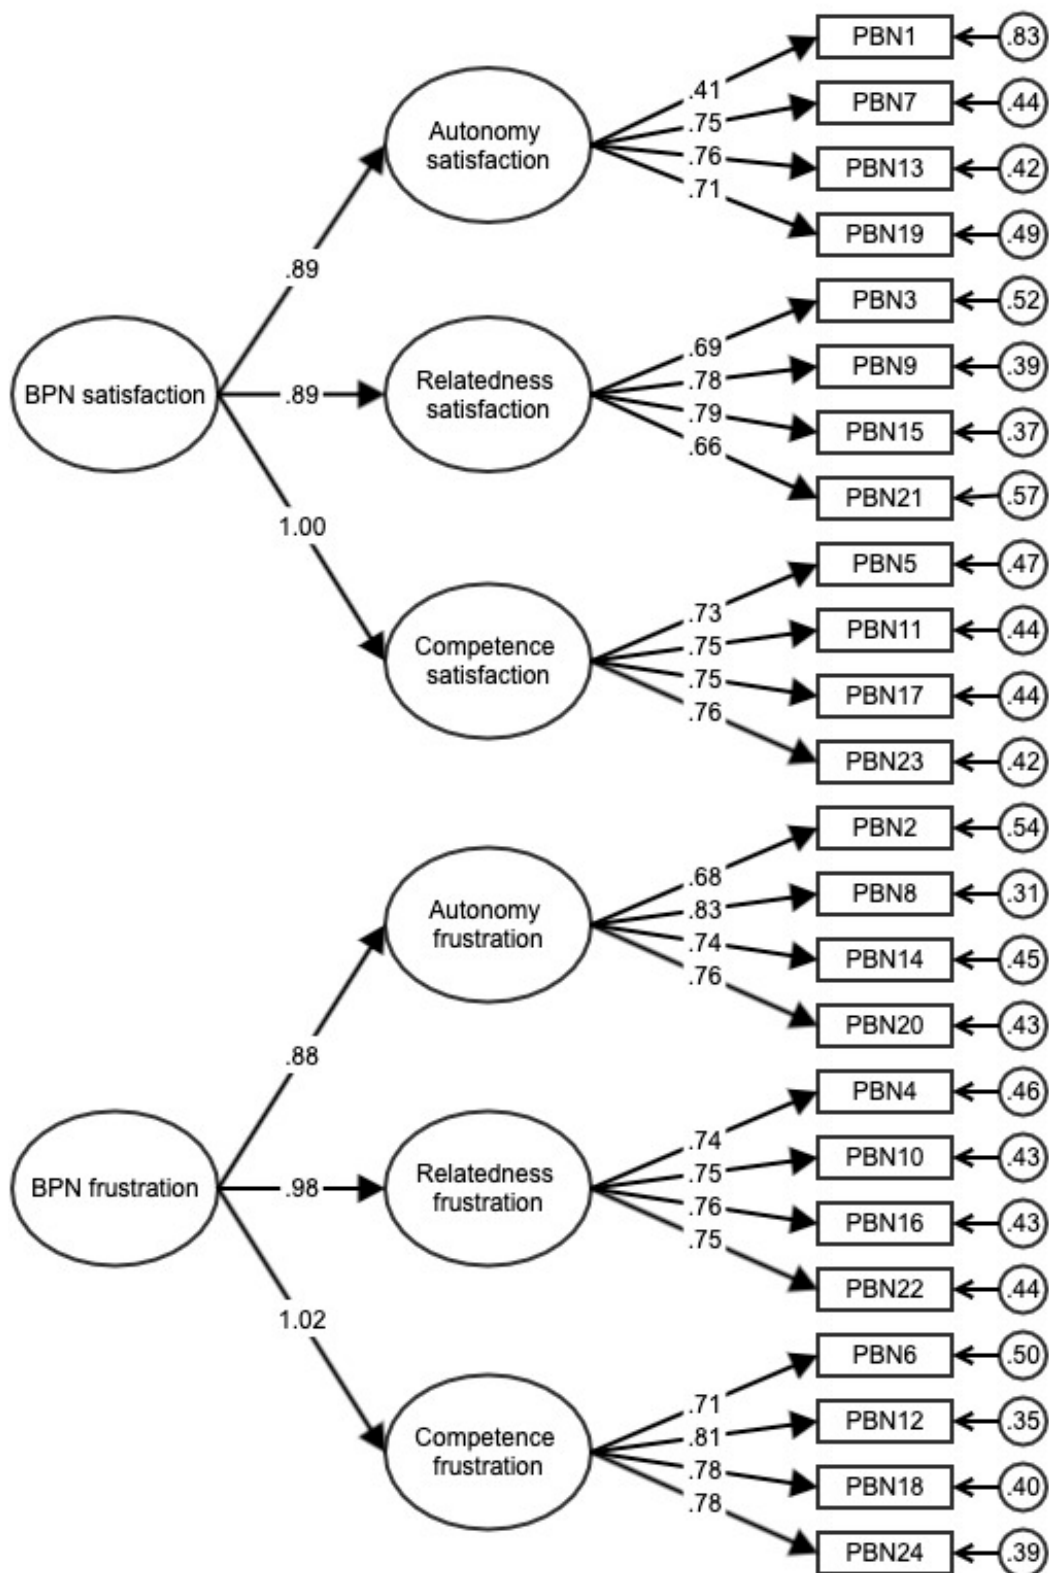

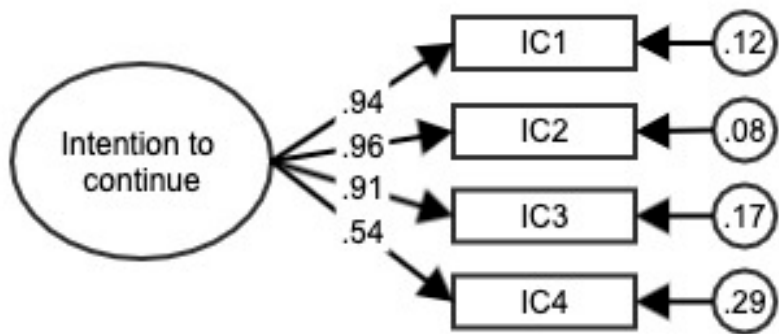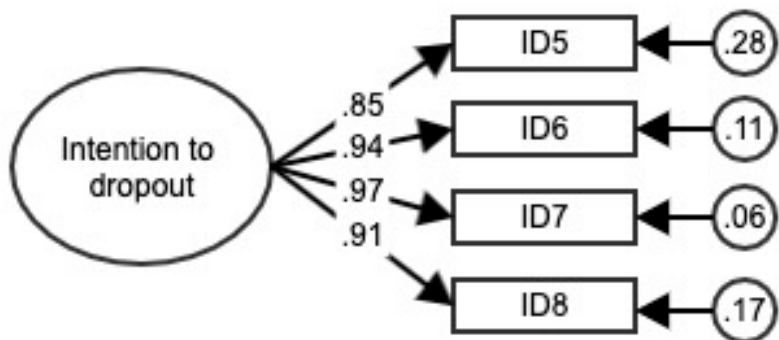

Supplement: s1 [file s1]
